# Supplementary material for: Association of a Multi-Gene Panel with Blood Pressure Medication Success in Patients with Hypertension: A Pilot Study
Source: Preprints.org preprint supplement (doi:10.20944/preprints201810.0028.v1), 2018-10-02
Supplement: Supplementary file 1 [file supplementary]

ACE indel PCR primer, reaction, and cycling conditions. **Supplemental Table 3.**

| SNP_ID        | INDEL_SEQ            |
|---------------|----------------------|
| rs1799752     |                      |
|               |                      |
| rs1799752_F-2 | CCCATTCTCTAGACCTGCT  |
| rs1799752_R-2 | GGGATGGTGTCTCGTACATA |

| Reaction Conditions | Volumes (ul) |
|---------------------|--------------|
| H2O                 | 7.7          |
| Buffer C 10x        | 1            |
| dNTPs (2.5mM)       | 0.8          |
| Forward (20 uM)     | 0.2          |
| Reverse (20 uM)     | 0.2          |
| Taq polymerase      | 0.1          |
| DNA (5ng/uL)        | 0            |
| Final volume:       | 10           |

| Cycling Conditions |            |        |
|--------------------|------------|--------|
| Temp (°C)          | Time (min) |        |
| 94                 | 3:00       |        |
| 94                 | 0:30       | Repeat |
| 60                 | 0:30       | 35     |
| 72                 | 1:20       | Cycles |
| 72                 | 3:00       |        |
| 4                  | forever    |        |
