# Supplementary material for: Association of a Multi-Gene Panel with Blood Pressure Medication Success in Patients with Hypertension: A Pilot Study
Source: Preprints.org preprint supplement (doi:10.20944/preprints201810.0028.v1), 2018-10-02
Supplement: Supplementary file 2 [file supplementary]

Single base extensions primer pool, reaction, and cycling conditions. **Supplemental Table 2.**

| SNP_ID     | UEP_SEQ                |
|------------|------------------------|
| rs3892097  | CGCATCTCCCACCCCA       |
| rs4961     | ACTGCTTCCATTCTGCC      |
| rs1042713  | GTCCGGCGCATGGCTTC      |
| rs1801252  | GCTGCCTCCCGCCAGCGAA    |
| rs1529927  | CACAGTGACCGAGACCACG    |
| rs1801253  | aaTTCCGCAAGGCCTTCCAG   |
| rs699      | GAAGACTGGCTGCTCCCTGA   |
| rs2107614  | TCCTCCAAAAAAGAAAAAC    |
| rs2228576  | gCTGCAGGGGCCAGTTCCTCC  |
| rs12750834 | ggaCAAAGCAGGCTTAATCTG  |
| rs5186     | CACTTCCCACTACCAAATGAGC |
| rs1042714  | tACCACCCACACCTCGTCCCTT |
| rs1159744  | ACTGATATTCTCTATTGTGAG  |

| Reaction Cnditions      | Final Concentration |
|-------------------------|---------------------|
| Water, HPLC             | N/A                 |
| iPlex Gold Buffer       | 0.222x              |
| iPlex Termination Mix   | 1x                  |
| iPlex Extend Primer Mix | varies              |
| iPlex Enzyme            | 1x                  |

| Cycling Conditions |            |          |           |
|--------------------|------------|----------|-----------|
| Temp (°C)          | Time (min) |          |           |
| 94                 | 0:30       |          |           |
| 94                 | 0:05       |          | 40 cycles |
| 52                 | 0:05       | 5 cycles | ↓         |
| 80                 | 0:05       | ↓        |           |
| 72                 | 3:00       |          |           |
| 4                  | forever    |          |           |
