# Supplementary material for: Association of a Multi-Gene Panel with Blood Pressure Medication Success in Patients with Hypertension: A Pilot Study
Source: Preprints.org preprint supplement (doi:10.20944/preprints201810.0028.v1), 2018-10-02
Supplement: Supplementary file 3 [file supplementary]

Multiplex PCR primer pools, reaction, and cycling conditions. **Supplemental Table 1.**

| SNP_ID     | 2nd-PCR                         | 1st-PCR                         |
|------------|---------------------------------|---------------------------------|
| rs3892097  | ACGTTGGATGGTGGGTGATGGGCAGAAG    | ACGTTGGATGCTGCAGAGACTccTCGGTCT  |
| rs4961     | ACGTTGGATGCACCTTAGCTTCGACTTGG   | ACGTTGGATGACAAGATGGCTGAACTCTGG  |
| rs1042713  | ACGTTGGATGCGAACTTGGCAATGGCTGTG  | ACGTTGGATGAGCGCCTTCTTGCTGGCAC   |
| rs1801252  | ACGTTGGATGCCTCGTTGCTGCCTCCCG    | ACGTTGGATGATGAGCGCCATCAGCAGAC   |
| rs1529927  | ACGTTGGATGTTGGACTCCCACTCCATGC   | ACGTTGGATGCCCATCGTGGACCCCATTA   |
| rs1801253  | ACGTTGGATGTCAACCCCATCATCTACTGC  | ACGTTGGATGGGTCTCCGTGGGTGCGGTG   |
| rs699      | ACGTTGGATGGATTGACAGGTTTCATGCAGG | ACGTTGGATGTGGACGTAGGTGTTGAAAGC  |
| rs2107614  | ACGTTGGATGGCAACCATCACAGTACTAAG  | ACGTTGGATGCACAACCTGGAAGAGTTGAGG |
| rs2228576  | ACGTTGGATGTCCCTCTCCAGCCTTGACAG  | ACGTTGGATGAACCTCTCCTTCCCTCTCAG  |
| rs12750834 | ACGTTGGATGACAGGCTACCTGGCTTTAAC  | ACGTTGGATGGGAATCCAGGAGAATAGGTC  |
| rs5186     | ACGTTGGATGAGAAGCCTGCACCATGTTTTG | ACGTTGGATGCAGTCCACATAATGCATTTTC |
| rs1042714  | ACGTTGGATGATGAGAGACATGACGATGCC  | ACGTTGGATGAGCGCCTTCTTGCTGGCAC   |
| rs1159744  | ACGTTGGATGGTTTTTCAGTTCCTGAATTTG | ACGTTGGATGGAAACAGTGACAGCCAAATG  |

| Reaction Conditions                        | Final Concentration   |
|--------------------------------------------|-----------------------|
| Water, HPLC                                | N/A                   |
| 10x PCR Buffer with 20mM MgCl <sub>2</sub> | 2mM MgCl <sub>2</sub> |
| 25mM MgCl <sub>2</sub>                     | 2mM                   |
| 25mM dNTP Mix                              | 500uM                 |
| 0.5mM Primer Mix                           | 0.1uM                 |
| 5U/uL PCR Enzyme                           | 1 unit                |

| Cycling Conditions |            |        |
|--------------------|------------|--------|
| Temp (°C)          | Time (min) |        |
| 95                 | 2:00       |        |
| 95                 | 0:30       | Repeat |
| 56                 | 0:30       | 45     |
| 72                 | 1:00       | Cycles |
| 72                 | 5:00       |        |
| 4                  | forever    |        |
